# Supplementary material for: A Role for Macro-ER-Phagy in ER Quality Control
Source: PubMed Central journal article supplement (PMC4504476; doi:10.1371/journal.pgen.1005390), 2015-07-16

# Figure S3

**A.**

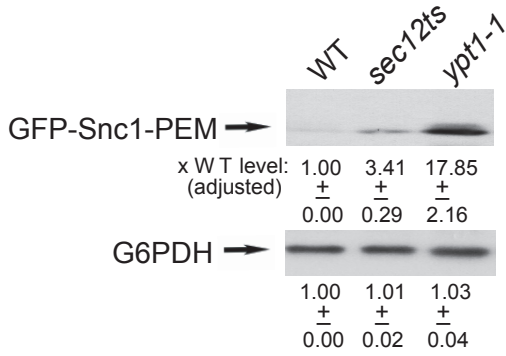

**B.**

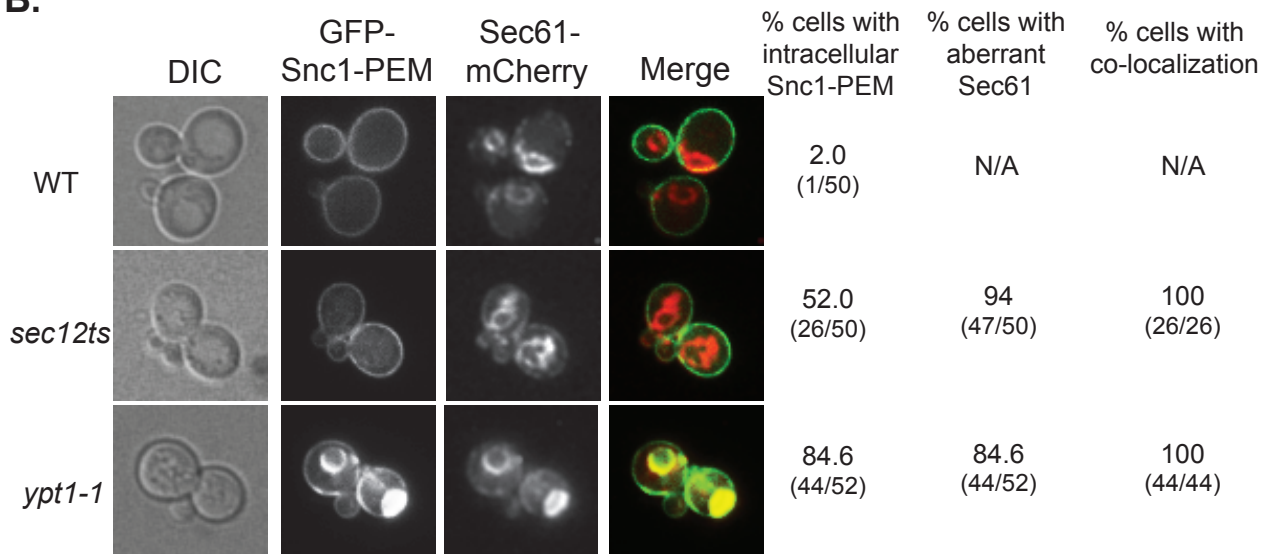

**C.**

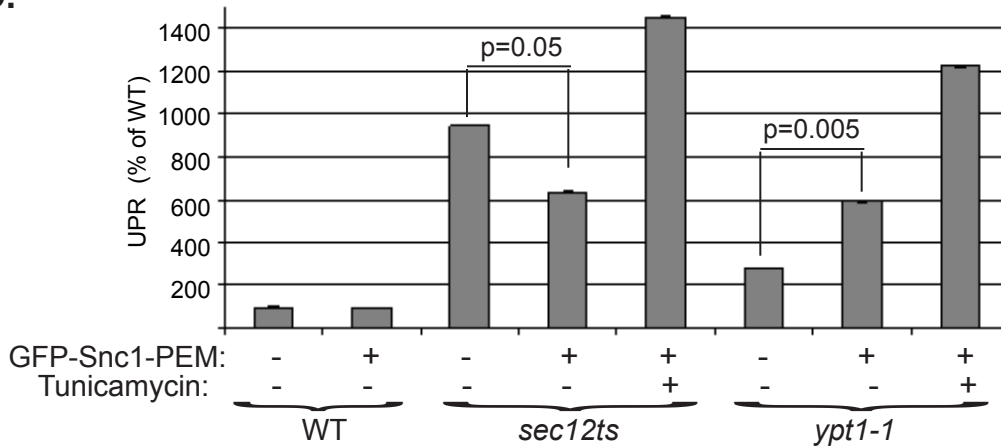

Supplement: pgen.1005390.s003.pdf [file pgen.1005390.s003.pdf]
